# Supplementary material
Source: PubMed Central journal article supplement (PMC3170455)
Supplement: NIHMS307844-supplement-2.pdf [file NIHMS307844-supplement-2.pdf]

## Supplementary data

Figure S1. NCI-60 10  $\mu$ M pyriplatin single dose growth data.

Figure S2. Effect of increasing pyriplatin concentrations on the cell cycle in A) HCT-116 and B) MCF7 cells, by flow cytometry. T=immediately after drug exposure, R=after wash-out.

Figure S3. Level of  $\gamma$ -H2AX after 24-h treatment of HOP-62 cells with platinum followed by incubation in drug-free medium for 0, 24, 48, or 72 h. The  $\alpha$ -tubulin was used as a loading control.

**Figure S4.** DNA platinum content after exposure to pyriplatin. HCT-116 cells were collected after 2-h platinum incubation, 2-h platinum incubation, followed by 22-h in platinum-free medium, and 24-h platinum incubation. Extracted DNA was analyzed for platinum content by ICP-MS.
