# Supplementary material
Source: PubMed Central journal article supplement (PMC3170455)

|                                                                         |                         |                     |                           |
|-------------------------------------------------------------------------|-------------------------|---------------------|---------------------------|
| <b>Developmental Therapeutics Program</b><br><b>One Dose Mean Graph</b> | NSC: 748461 / 1         | Conc: 1.00E-5 Molar | Test Date: Aug 25, 2008   |
|                                                                         | Experiment ID: 0808Q008 |                     | Report Date: Jan 12, 2008 |

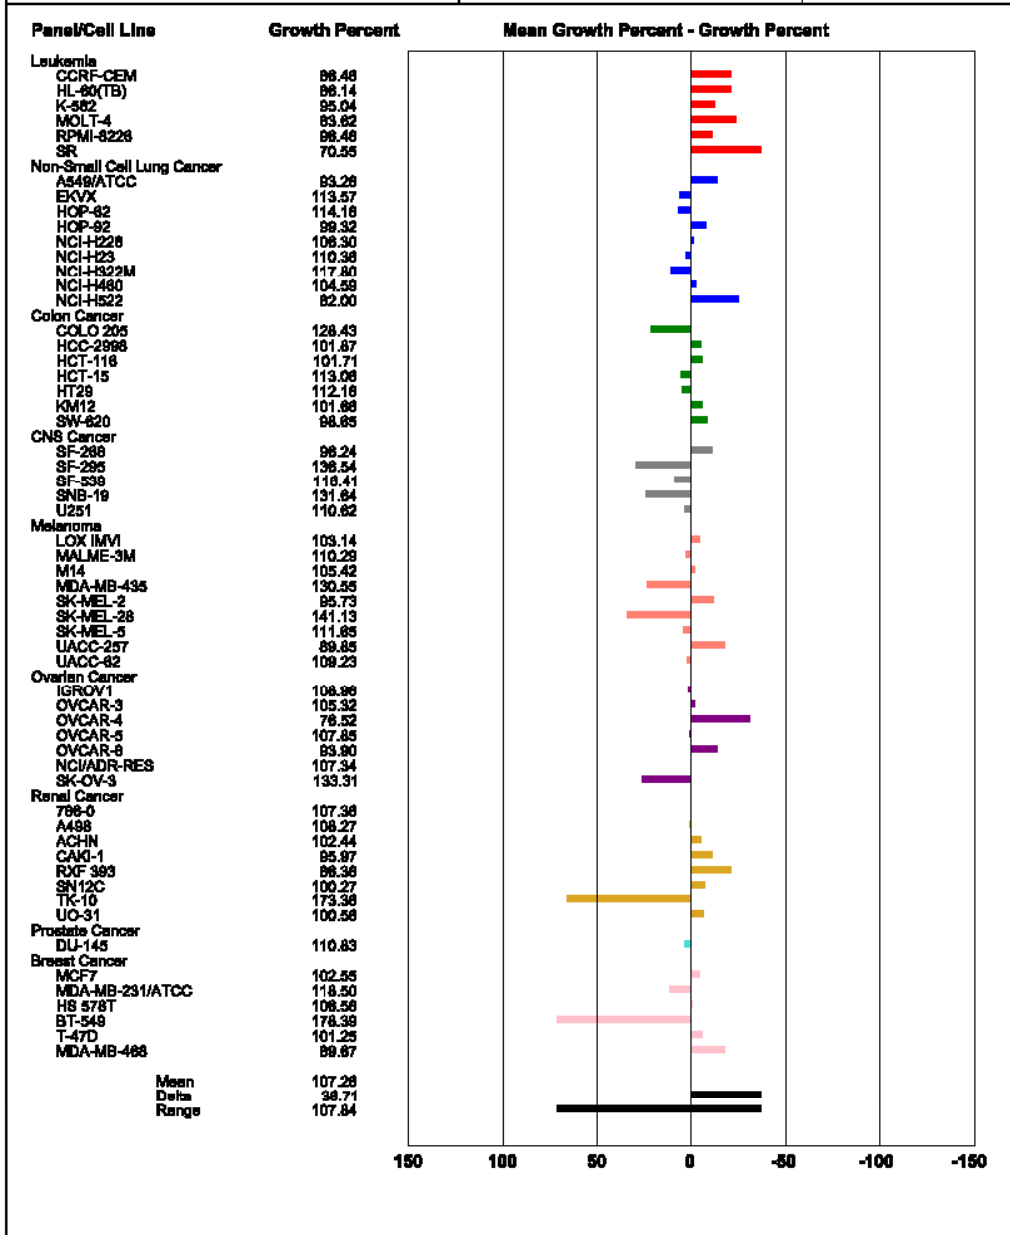

**A**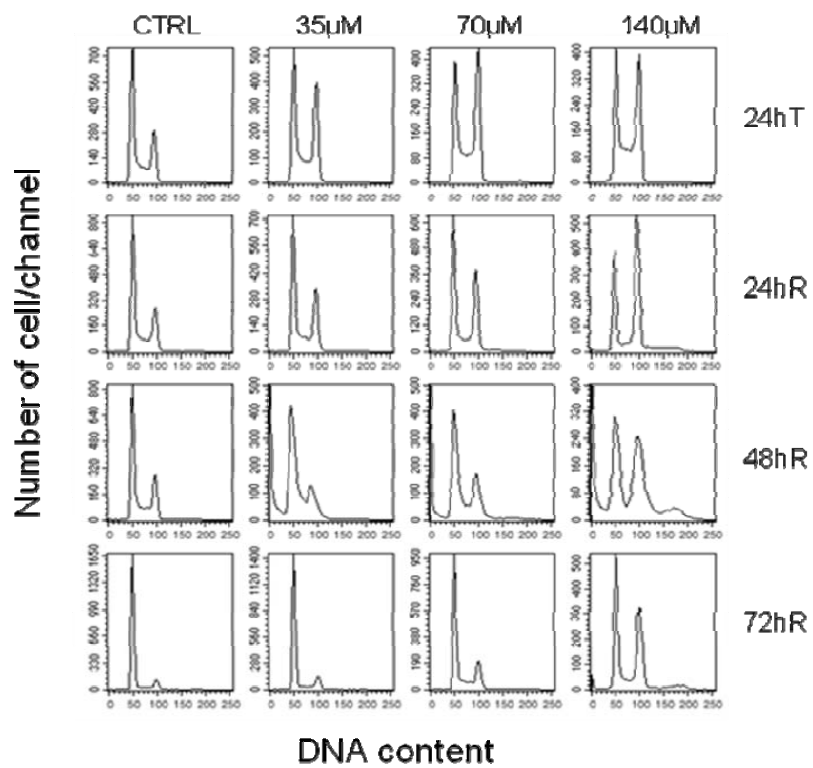**B**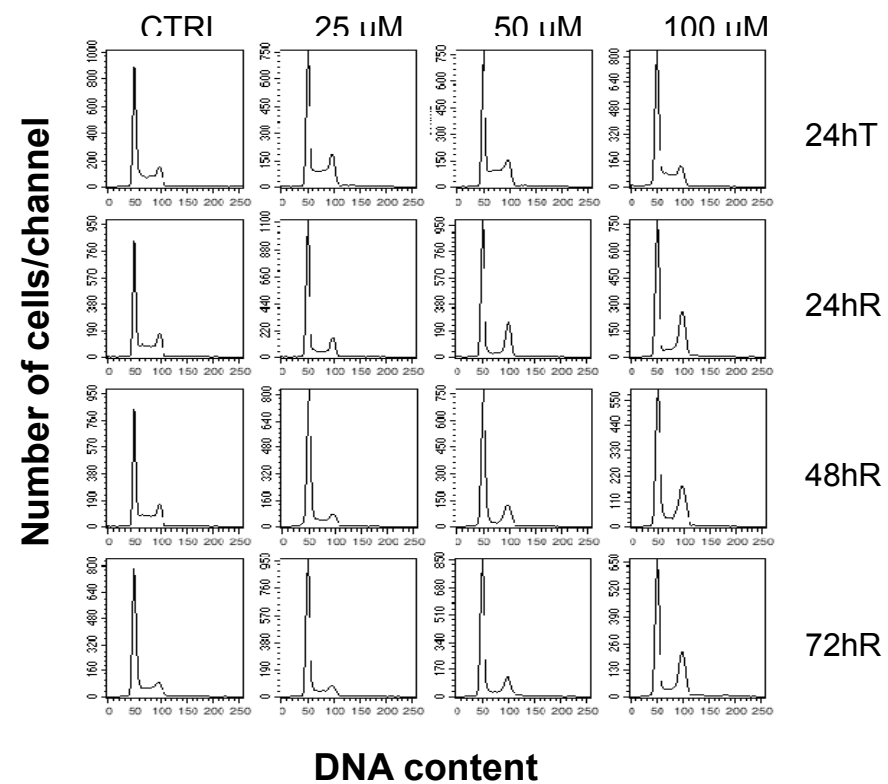

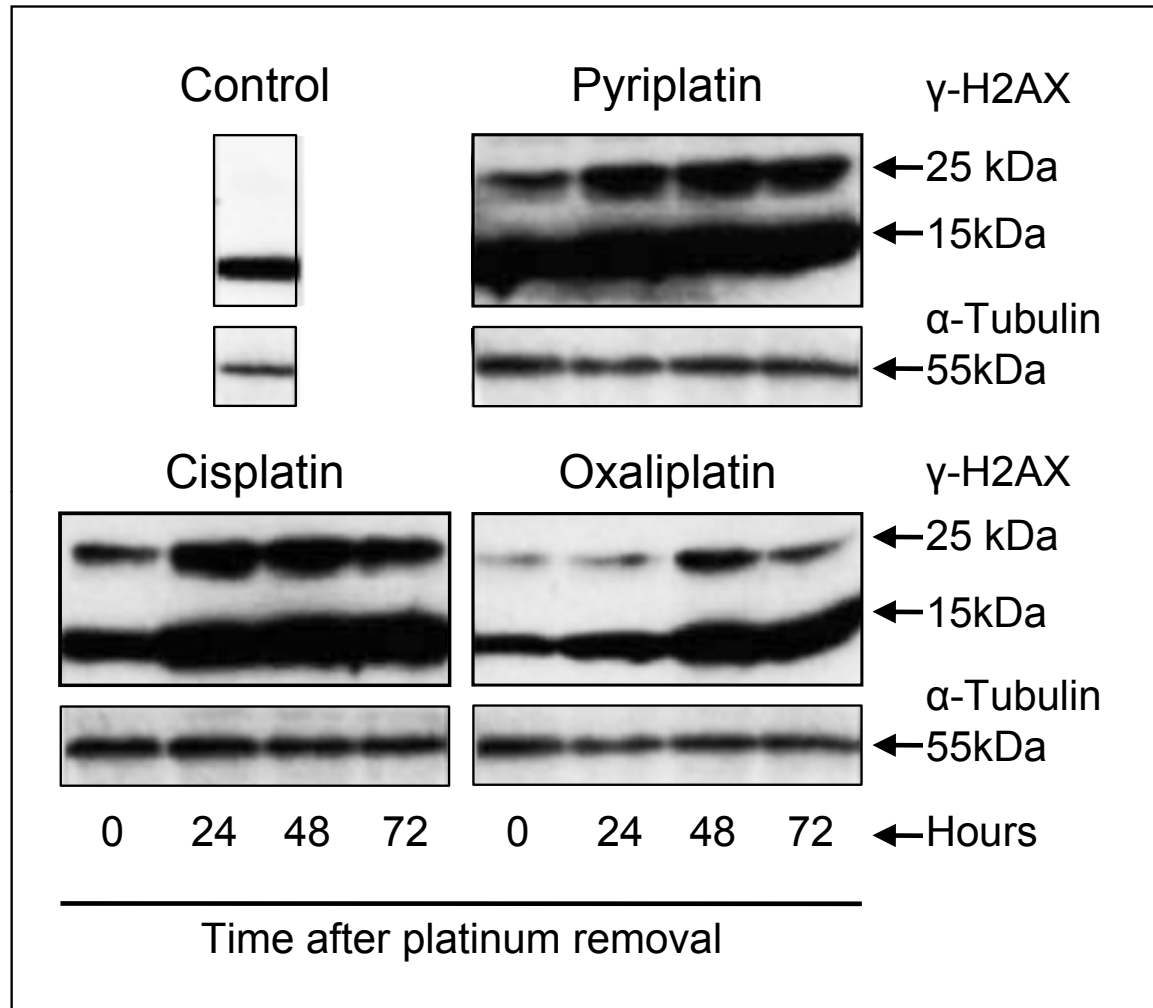

2-h platinum

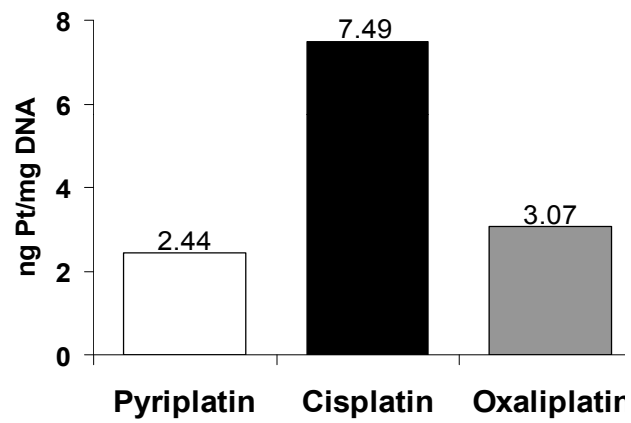

2-h platinum+22-h washout

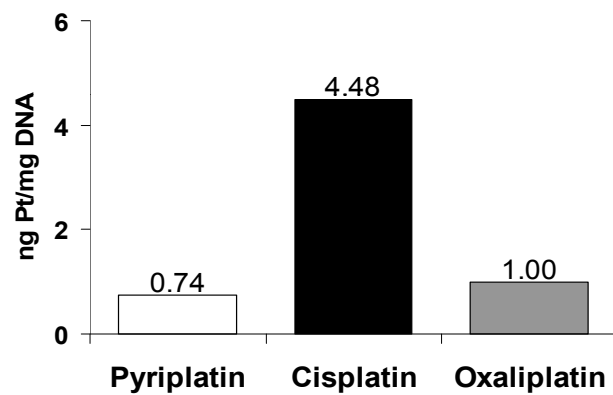

24-h platinum

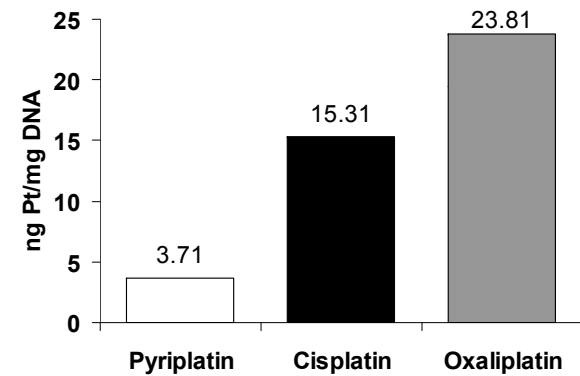

Supplement: NIHMS307844-supplement-Supporting_info.pdf [file NIHMS307844-supplement-Supporting_info.pdf]
